# Supplementary material for: Structure–Activity Relationship of Graphene-Based Materials: Impact of the Surface Chemistry, Surface Specific Area and Lateral Size on Their In Vitro Toxicity
Source: MDPI journal article supplement (doi:10.3390/nano11112963), 2021-11-04

Supplementary data

Table S1: ICP analysis

|                  | ICP results (ppm) |     |    |      |    |     |     |      |      |    |      |      |     |      |     |       |    |     |    |     |     |     |    |
|------------------|-------------------|-----|----|------|----|-----|-----|------|------|----|------|------|-----|------|-----|-------|----|-----|----|-----|-----|-----|----|
|                  | Al                | B   | Ba | Ca   | Co | Cr  | Cu  | Fe   | K    | Li | Mg   | Mn   | Mo  | Na   | Ni  | S     | Si | Sn  | Sr | Ti  | V   | Zn  | Zr |
| GNP1             | 54                | 16  | 1  | 90   | 0  | 2   | 2   | 21   | 47   | 0  | 45   | 0    | 7   | 40   | 0   | 44    | 0  | 4   | 0  | 20  | 4   | 32  | 13 |
| GNP2             | 430               | 92  | 3  | 538  | 0  | 1   | 5   | 1008 | 201  | 0  | 304  | 13   | 2   | 162  | 5   | 136   | 0  | 368 | 1  | 34  | 8   | 12  | 3  |
| GNP3             | 434               | 97  | 5  | 147  | 0  | 26  | 21  | 589  | 708  | 0  | 182  | 6    | 19  | 420  | 22  | 421   | 0  | 32  | 2  | 108 | 33  | 8   | 13 |
| GNP4             | 169               | 76  | 2  | 78   | 0  | 300 | 17  | 1015 | 403  | 0  | 29   | 32   | 15  | 162  | 81  | 2346  | 0  | 13  | 1  | 293 | 33  | 33  | 8  |
| GNP5             | 113               | 58  | 1  | 40   | 0  | 275 | 7   | 1279 | 233  | 0  | 37   | 32   | 9   | 168  | 136 | 1472  | 0  | 14  | 0  | 5   | 9   | 23  | 5  |
| GNP6             | 108               | 115 | 1  | 33   | 0  | 350 | 9   | 1594 | 196  | 0  | 37   | 45   | 9   | 188  | 175 | 1910  | 0  | 9   | 0  | 33  | 9   | 12  | 4  |
| GNP7             | 87                | 45  | 1  | 20   | 0  | 222 | 5   | 1044 | 265  | 0  | 38   | 42   | 5   | 197  | 91  | 6464  | 0  | 9   | 0  | 138 | 12  | 13  | 2  |
| GNP8             | 118               | 21  | 1  | 42   | 0  | 201 | 9   | 1068 | 223  | 0  | 80   | 29   | 3   | 135  | 90  | 12114 | 0  | 10  | 0  | 70  | 6   | 15  | 4  |
| GNP9             | 117               | 61  | 1  | 122  | 0  | 231 | 5   | 1224 | 299  | 0  | 61   | 34   | 4   | 145  | 100 | 9431  | 0  | 13  | 0  | 34  | 7   | 23  | 3  |
| GNP10            | 86                | 5   | 1  | 63   | 0  | 214 | 4   | 1270 | 173  | 0  | 36   | 42   | 4   | 319  | 100 | 1420  | 0  | 17  | 0  | 8   | 7   | 13  | 2  |
| GNP11            | 184               | 16  | 1  | 83   | 0  | 267 | 8   | 1149 | 134  | 0  | 97   | 52   | 4   | 173  | 101 | 2085  | 0  | 6   | 0  | 5   | 4   | 22  | 1  |
| GNP12            | 197               | 42  | 3  | 784  | 0  | 3   | 154 | 5980 | 189  | 0  | 207  | 29   | 4   | 73   | 32  | 3727  | 0  | 9   | 2  | 9   | 6   | 17  | 2  |
| GNP13            | 119               | 72  | 1  | 65   | 0  | 0   | 0   | 524  | 137  | 28 | 4    | 5    | 0   | 76   | 8   | 20    | 0  | 7   | 1  | 16  | 127 | 22  | 2  |
| GNP14            | 85                | 41  | 4  | 235  | 0  | 7   | 8   | 2373 | 114  | 0  | 28   | 19   | 4   | 47   | 6   | 28    | 0  | 9   | 2  | 23  | 11  | 30  | 1  |
| GNP15            | 87                | 54  | 12 | 203  | 0  | 0   | 0   | 1173 | 121  | 0  | 24   | 6    | 3   | 46   | 2   | 44    | 0  | 9   | 5  | 35  | 7   | 16  | 3  |
| rGO3             | 236               | 76  | 1  | 135  | 0  | 54  | 3   | 252  | 393  | 0  | 30   | 2058 | 3   | 98   | 24  | 156   | 0  | 307 | 1  | 3   | 5   | 221 | 2  |
| rGO4             | 279               | 155 | 4  | 1315 | 0  | 7   | 0   | 151  | 1907 | 0  | 1257 | 299  | 66  | 4518 | 77  | 14679 | 0  | 14  | 14 | 3   | 11  | 599 | 7  |
| rGO5             | 269               | 230 | 2  | 1661 | 0  | 64  | 0   | 215  | 1035 | 0  | 1369 | 431  | 15  | 1618 | 34  | 2819  | 0  | 196 | 15 | 68  | 12  | 55  | 56 |
| rGO6             | 372               | 212 | 10 | 668  | 0  | 13  | 0   | 557  | 2403 | 0  | 585  | 1479 | 169 | 3089 | 658 | 4440  | 0  | 17  | 7  | 6   | 11  | 146 | 3  |
| rGO7             | 235               | 239 | 3  | 1416 | 0  | 0   | 0   | 95   | 1866 | 0  | 1360 | 457  | 111 | 5893 | 53  | 9714  | 0  | 15  | 14 | 17  | 7   | 35  | 3  |
| rGO8             | 463               | 426 | 3  | 338  | 0  | 34  | 9   | 224  | 1512 | 0  | 209  | 1907 | 27  | 862  | 36  | 5141  | 0  | 36  | 3  | 567 | 52  | 34  | 12 |
| rGO9             | 402               | 165 | 2  | 256  | 0  | 23  | 0   | 215  | 1505 | 0  | 235  | 1847 | 23  | 744  | 38  | 761   | 0  | 73  | 2  | 676 | 51  | 66  | 7  |
| Amorphous Silica | 3223              | 43  | 19 | 388  | 0  | 0   | 0   | 62   | 90   | 0  | 49   | 1    | 2   | 7669 | 0   | 3356  | 0  | 5   | 1  | 24  | 2   | 7   | 6  |
| CB1              | 136               | 15  | 1  | 411  | 0  | 2   | 0   | 66   | 221  | 0  | 152  | 1    | 0   | 667  | 1   | 10799 | 0  | 5   | 5  | 2   | 2   | 29  | 0  |
| CB2              | 92                | 11  | 1  | 286  | 0  | 1   | 0   | 46   | 216  | 0  | 97   | 1    | 0   | 101  | 1   | 9875  | 0  | 7   | 1  | 3   | 0   | 20  | 0  |

Table S2: XPS analysis

|                  | XPS (atomic %) |      |     |     |      |
|------------------|----------------|------|-----|-----|------|
|                  | C              | O    | N   | S   | Si   |
| GNP1             | 96,8           | 3,2  | 0,0 | 0,0 | 0,0  |
| GNP2             | 93,7           | 6,3  | 0,0 | 0,0 | 0,0  |
| GNP3             | 92,4           | 7,6  | 0,0 | 0,0 | 0,0  |
| GNP4             | 95,7           | 4,3  | 0,0 | 0,0 | 0,0  |
| GNP5             | 96,7           | 3,3  | 0,0 | 0,0 | 0,0  |
| GNP6             | 97,3           | 2,6  | 0,0 | 0,1 | 0,0  |
| GNP7             | 95,4           | 4,2  | 0,0 | 0,4 | 0,0  |
| GNP8             | 93,2           | 5,9  | 0,5 | 0,4 | 0,0  |
| GNP9             | 93,2           | 5,7  | 0,7 | 0,3 | 0,0  |
| GNP10            | 97,9           | 2,1  | 0,0 | 0,0 | 0,0  |
| GNP11            | 97,5           | 2,5  | 0,0 | 0,0 | 0,0  |
| GNP12            | 93,2           | 6,1  | 0,8 | 0,0 | 0,0  |
| GNP13            | 95,6           | 4,4  | 0,0 | 0,0 | 0,0  |
| GNP14            | 94,9           | 4,5  | 0,6 | 0,0 | 0,0  |
| GNP15            | 96,0           | 3,5  | 0,5 | 0,0 | 0,0  |
| rGO3             | 88,1           | 11,9 | 0,0 | 0,0 | 0,0  |
| rGO4             | 91,7           | 7,2  | 0,0 | 1,0 | 0,0  |
| rGO5             | 96,6           | 2,7  | 0,6 | 0,2 | 0,0  |
| rGO6             | 84,1           | 15,9 | 0,0 | 0,0 | 0,0  |
| rGO7             | 92,6           | 6,7  | 0,0 | 0,7 | 0,0  |
| rGO8             | 82,8           | 17,2 | 0,0 | 0,0 | 0,0  |
| rGO9             | 95,2           | 2,6  | 2,2 | 0,0 | 0,0  |
| Amorphous Silica | 96,9           | 2,6  | 0,0 | 0,5 | 0,0  |
| CB1              | 97,2           | 2,3  | 0,0 | 0,5 | 0,0  |
| CB2              | 3,6            | 70,0 | 0,0 | 0,0 | 26,4 |

**Figure S1: Raman spectra for RGOs (a) and for GNPs (b)**

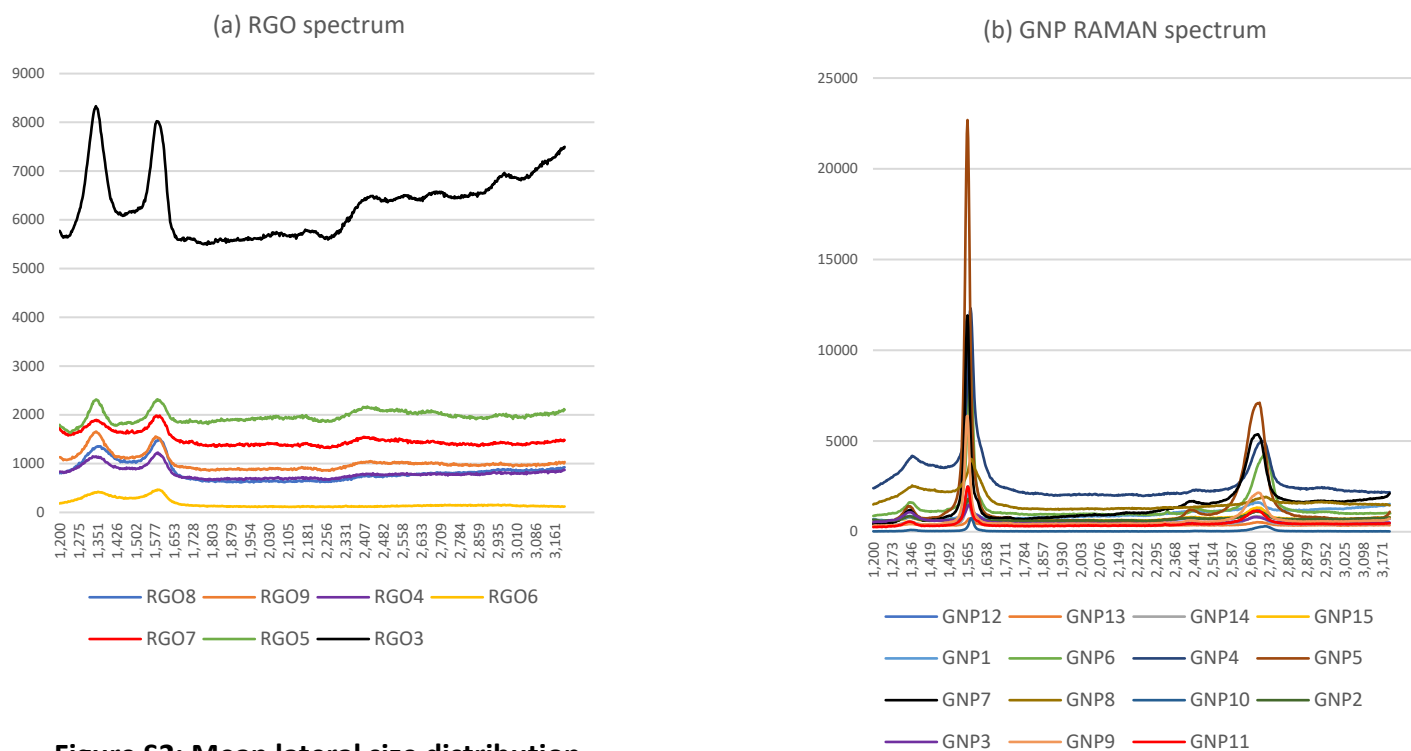

**Figure S2: Mean lateral size distribution**

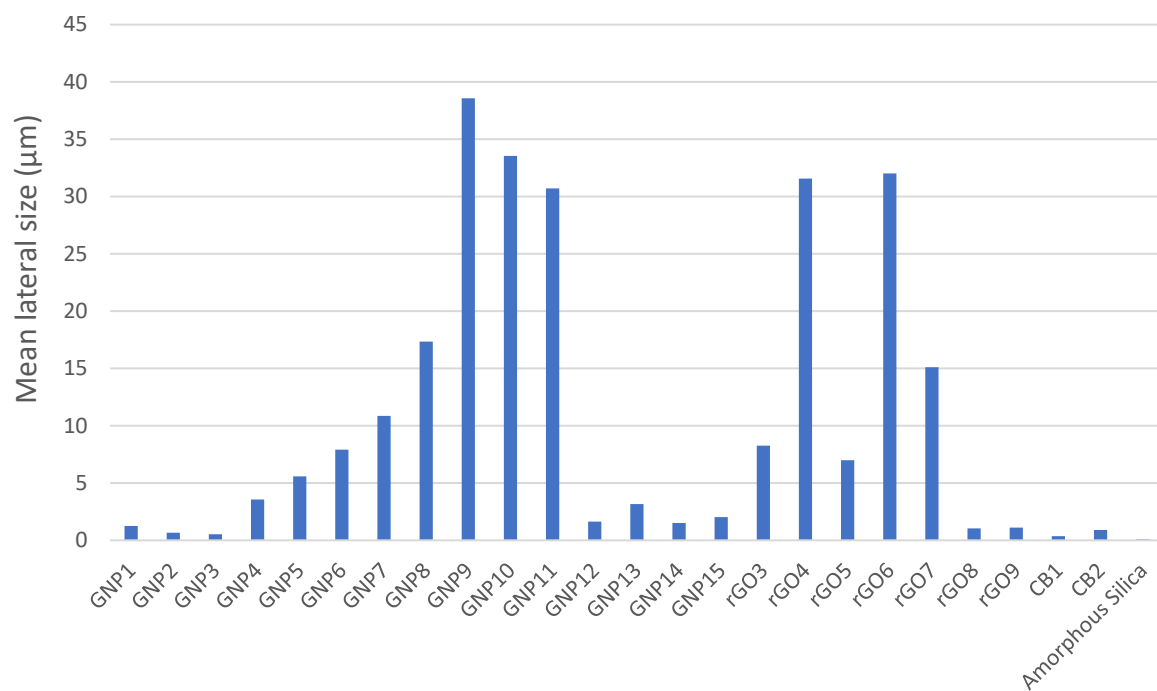

**Figure S3: Specific surface area distribution**



**Figure S4: Correlation between specific surface area and mean lateral size.**

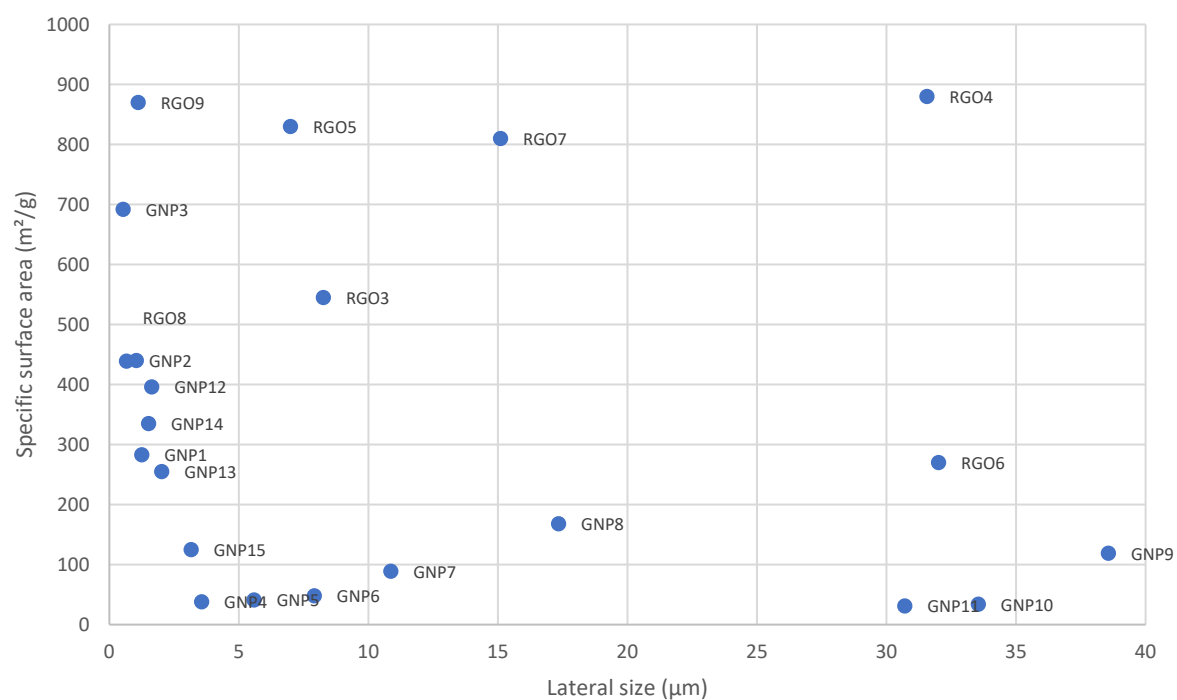

Supplement: s1 [file s1]
